# Supplementary material for: Interaction of tankyrase and peroxiredoxin II is indispensable for the survival of colorectal cancer cells
Source: PubMed Central journal article supplement (PMC5489516; doi:10.1038/s41467-017-00054-0), 2017-06-28

File name: Supplementary Information

Description: Supplementary figures.

File name: Peer review file

Description:

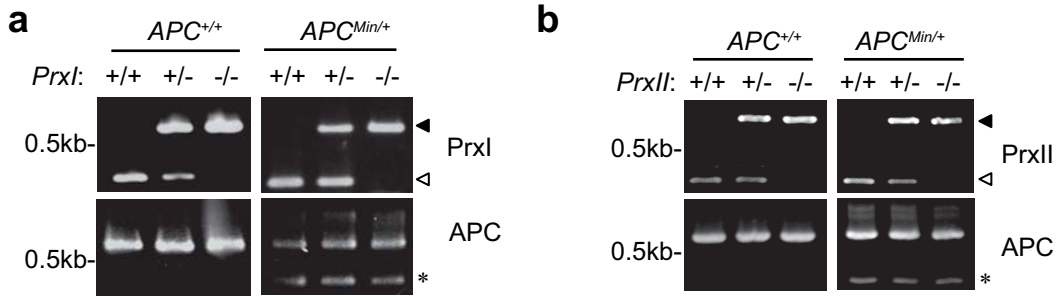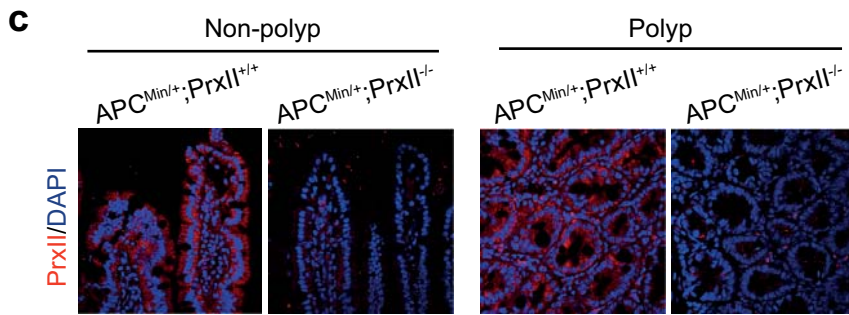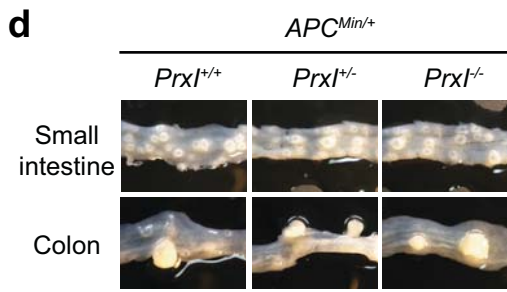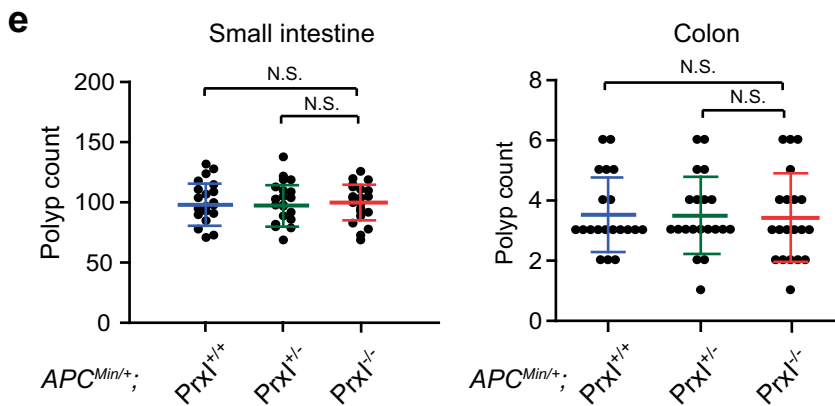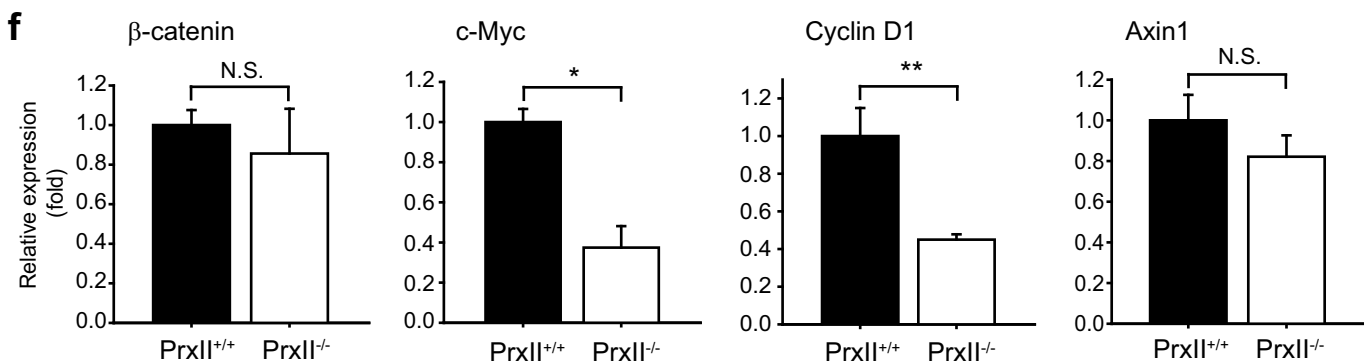

**Supplementary Fig. 1. Deletion of PrxI and PrxII in  $APC^{Min/+}$  mice.**

**a and b.** The double mutant mice were generated by mating  $PrxI^{+/-}$  or  $PrxII^{+/-}$  mice with  $APC^{Min/+}$  mice. Mice were genotyped at 4 weeks by genomic PCR. The gene products for  $PrxI/II^{+/+}$  and  $PrxI/II^{-/-}$  mice are indicated by arrowheads (wild type, *closed arrowhead*; neo cassette, *filled arrowhead*). The gene product for truncated  $APC$  gene is indicated by an asterisk. The DNA size markers are labeled in kilobases (kb).

**c.** PrxII protein expression shown by immunofluorescence staining in non-polyp segments and polyps in the small intestine. Nuclei were stained with DAPI. Scale bar, 50  $\mu$ m.

**d.** Representative photomicrographs of longitudinally-opened intestinal tissues from  $APC^{Min/+};PrxI^{+/+}$ ,  $APC^{Min/+};PrxI^{+/-}$ , and  $APC^{Min/+};PrxI^{-/-}$  mice. Scale bar, 5 mm.

**e.** The macroscopic polyps (> 3 mm in diameter) were counted in whole-mount intestinal tissues from  $APC^{Min/+};PrxI^{+/+}$ ,  $APC^{Min/+};PrxI^{+/-}$ , and  $APC^{Min/+};PrxI^{-/-}$  mice. Dot plots represent the average polyp numbers  $\pm$  SD ( $n = 20$  mice per group,  $P = 0.9144$  (small intestine) and 0.7282 (colon) for  $APC^{Min/+};PrxI^{+/+}$  vs  $APC^{Min/+};PrxI^{-/-}$ ,  $P = 0.8592$  (small intestine) and 0.8193 (colon) for  $APC^{Min/+};PrxI^{+/-}$  vs  $APC^{Min/+};PrxI^{-/-}$  with repeated measures ANOVA). N.S., not significant.

**f.** Expression of Axin1,  $\beta$ -catenin, and  $\beta$ -catenin target genes in polyps from  $APC^{Min/+};PrxII^{+/+}$  and  $APC^{Min/+};PrxII^{-/-}$  mice. Level of mRNA was measured by quantitative real-time PCR as described in *Methods*. Data in the graph are means  $\pm$  SD of fold change in mRNA level versus that of  $APC^{Min/+};PrxII^{+/+}$  mice ( $n = 4$  mice per group; \* $P < 0.01$ ; \*\* $P < 0.001$ ). N.S., not significant.

**a**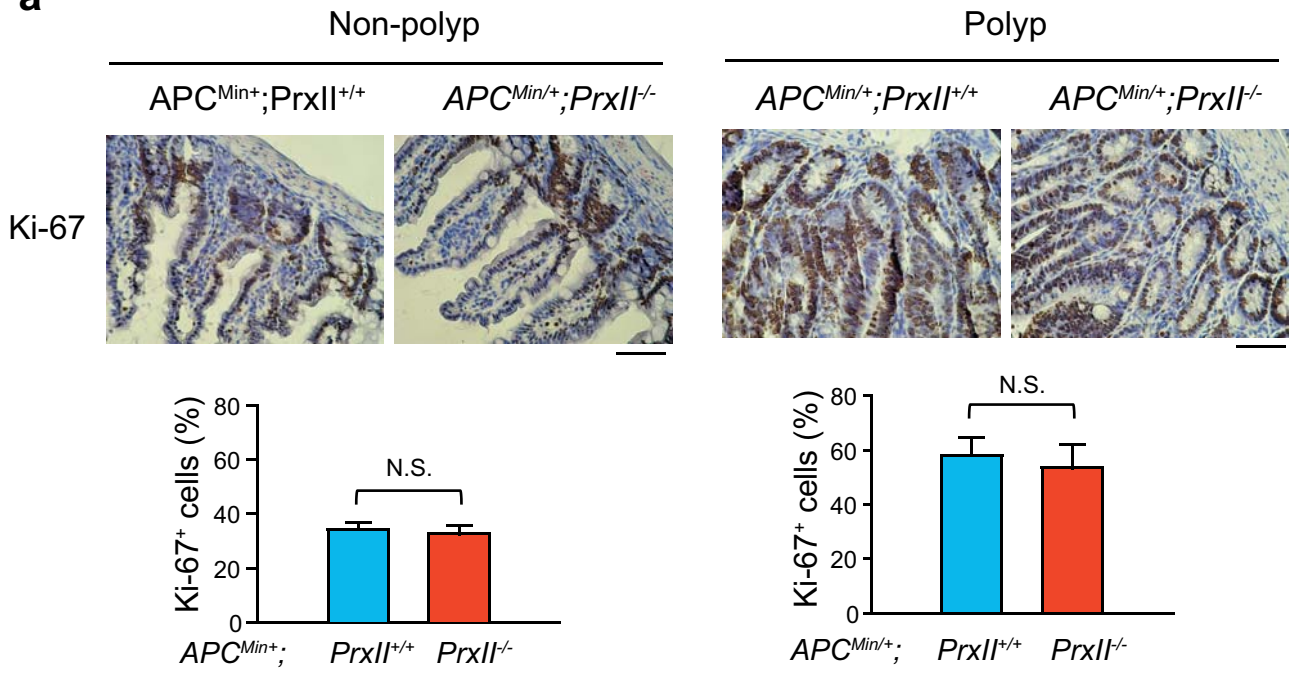**b**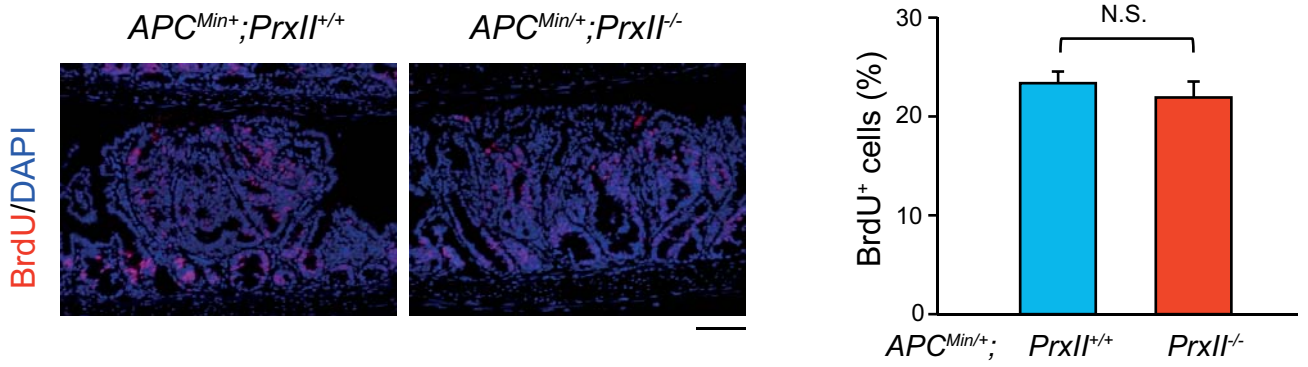**c**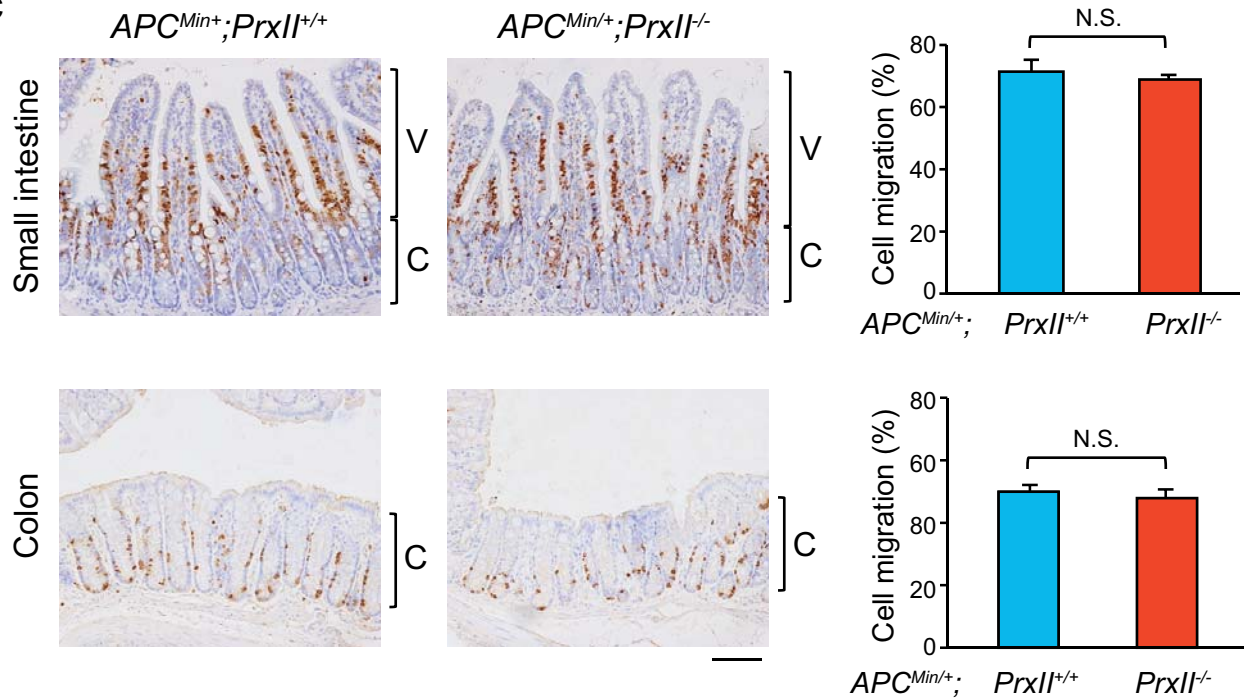

**Supplementary Fig. 2. Proliferation and migration of epithelial cells in the intestinal polyps and villi of  $APC^{Min/+};PrxII^{+/+}$  and  $APC^{Min/+};PrxII^{-/-}$  mice.**

**a.** Immunohistochemistry images for Ki-67 in the non-polyp segments and the polyps of  $APC^{Min/+};PrxII^{+/+}$  and  $APC^{Min/+};PrxII^{-/-}$  mice. DAB staining in the images was quantified using HistoFAXS (TissuGnostics). Data in the graph are means  $\pm$  SD of the intensity measured ( $n = 5$  per group,  $P = 0.3477$  (non-polyp) and  $0.3559$  (polyp)). Scale bar,  $50 \mu\text{m}$ .

**b.** Number of proliferating cells in the polyps in the small intestine. 5-bromo-2'-deoxyuridine (BrdU) incorporation was performed for 2 hr after intraperitoneal injection (0.1 ml injection of 10 mM BrdU in PBS per 10g body weight). Paraffin tissue sections were immunostained with anti-BrdU antibody. Cell numbers were counted using the Image J program. Data in the graph are means  $\pm$  SEM of the number of BrdU-positive cells per polyp ( $n = 4$  mice for  $PrxII^{+/+}$ ,  $n = 3$  mice for  $PrxII^{-/-}$ ,  $P = 0.4816$  with two-tailed  $t$ -test). Scale bar,  $50 \mu\text{m}$ .

**c.** Migration of epithelial cells in the villi of small intestine and colon. BrdU incorporation was performed for 30 hr after intraperitoneal injection. Paraffin tissue sections were immunostained with anti-BrdU antibody. Cell migration was determined by measuring the length of the most migrating cell from bottom of crypt using NIS-Elements BR3.2 imaging software (Nikon). Data in the graph are means  $\pm$  SEM of the percent of the length of most migrating cell per total length of villus (V) plus crypt (C) or crypt ( $n = 3$  mice for  $PrxII^{+/+}$ ,  $n = 5$  mice for  $PrxII^{-/-}$ ,  $P = 0.6159$  (small intestine) and  $P = 0.1851$  (colon) with two-tailed  $t$ -test). A representative image is shown. N.S., not significant. Scale bar,  $50 \mu\text{m}$ .

**a**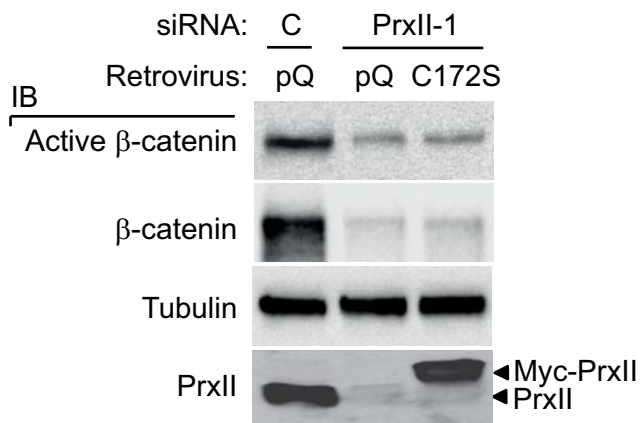**b**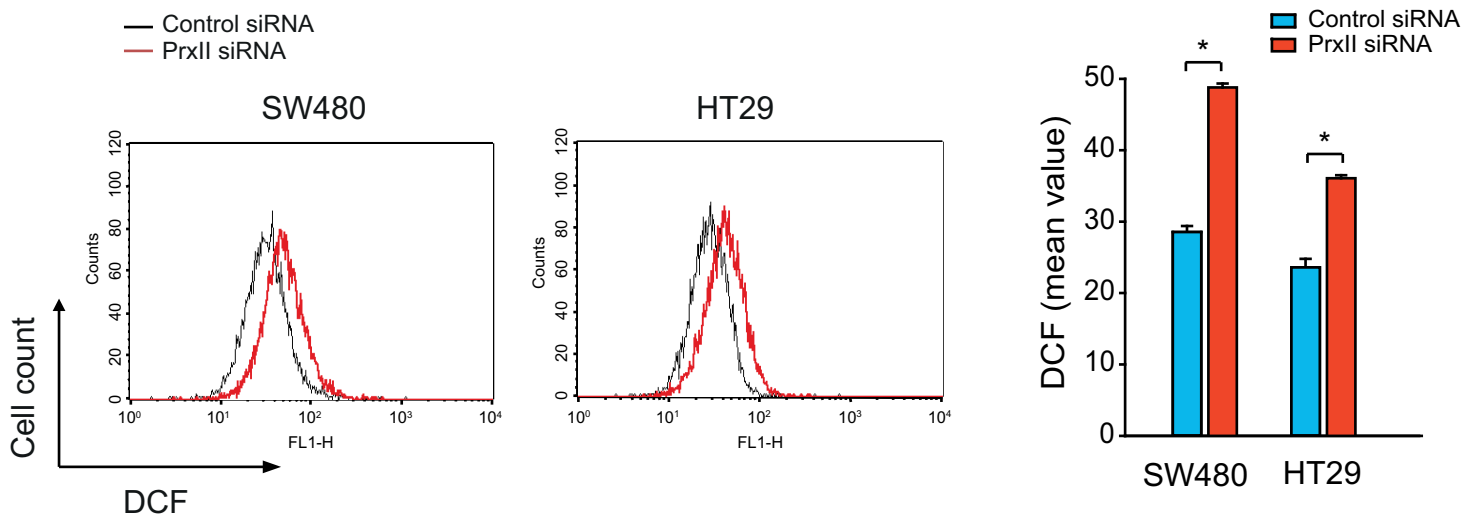

### Supplementary Fig. 3. APC-dependent cellular H<sub>2</sub>O<sub>2</sub> levels in CRC cells

**a.** HT29 cells were transfected with control or PrxII-1 siRNA for 24 hr and then infected with retroviruses expressing siRNA-resistant PrxII-C172S mutant with a Myc tag for additional 24 hr. Empty retrovirus (pQ) was used for control. The cell lysate were subjected to Western blotting for indicated proteins.

**b.** Intracellular H<sub>2</sub>O<sub>2</sub> level was increased by PrxII depletion in SW480 and HT29 cells. CRC cells were transfected with control and PrxII-siRNA for 24 hr. Next day, cells were rinsed with a phenol-red-free basal medium and incubated with 5 μM 5,6-chloromethyl-2',7'-dichlorohydrofluorescein diacetate at 37 °C for 30 min. The cells were trypsinized and analyzed with a flow cytometry. Data in the graph are means ± SD of dichlorofluorescein (DCF) fluorescence values from three independent experiments (\**P* < 0.001)

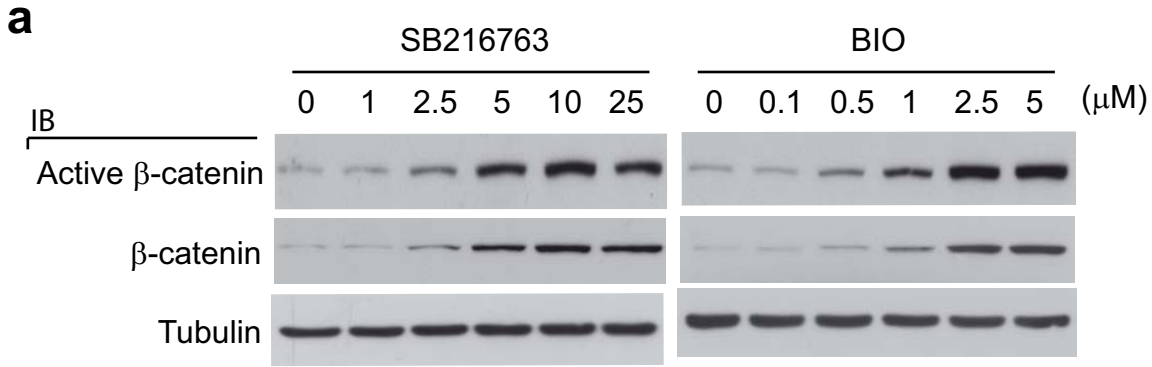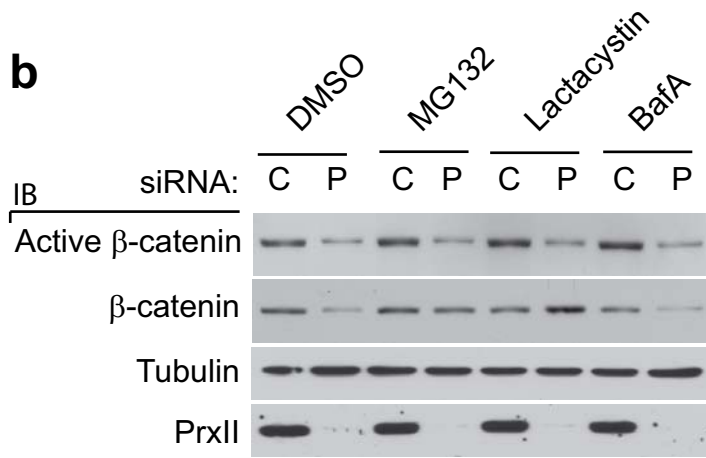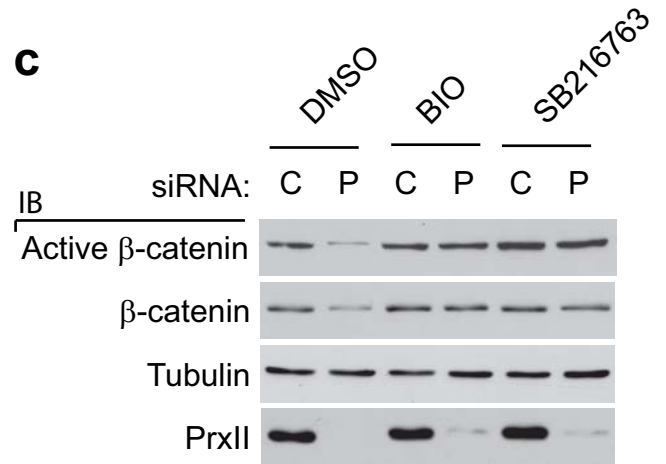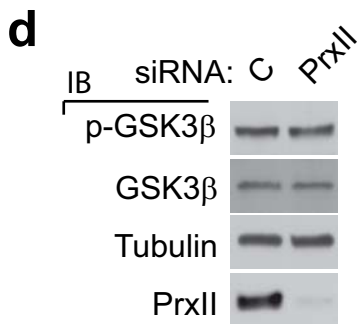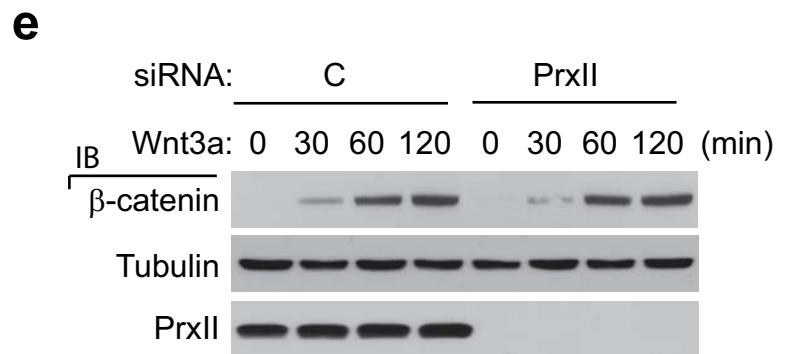

**Supplementary Fig. 4. Effect of proteasomal and GSK3 $\beta$  inhibition on PrxII-dependent  $\beta$ -catenin degradation in APC-mutant CRC cells.**

**a.** Titration of GSK3 $\beta$  inhibitors (SB216763 and BIO) for  $\beta$ -catenin stabilization. HEK293 cells were treated with increasing concentrations of the indicated compounds and subjected to immunoblot (IB) analysis for total and active  $\beta$ -catenins. The optimal concentrations for maximum inhibition were determined to be 10  $\mu$ M and 2.5  $\mu$ M for SB216763 and BIO, respectively. Active  $\beta$ -catenin represents the transcriptionally active form unphosphorylated on Ser37/Thr41.

**b and c.** HT29 cells were transfected with control (C) and PrxII-1 siRNA for 24 hr and then treated with proteasome and GSK3 $\beta$  inhibitors (MG132, 25 $\mu$ M; lactacystin, 1 $\mu$ M; bafilomycin A1 (BafA), 100 nM; SB216763, 10  $\mu$ M; BIO, 2.5  $\mu$ M) for further 24 hr. The lysosomal inhibitor BafA did not restore the  $\beta$ -catenin level. Control vehicle was dimethyl sulfoxide (DMSO).

**d.** SW480 cells were transfected with control and PrxII-1 siRNA for 24 hr and immunoblotted for Y216 phosphorylation, an indicator of GSK3 $\beta$  activation.

**e.** HEK293 cells were transfected with control and PrxII-1 siRNA and then treated with Wnt3a (100 ng/ml) for the indicated times. The cytosolic fraction was isolated by ultracentrifugation and subjected to immunoblot analysis. A representative blot from three independent experiments is shown.



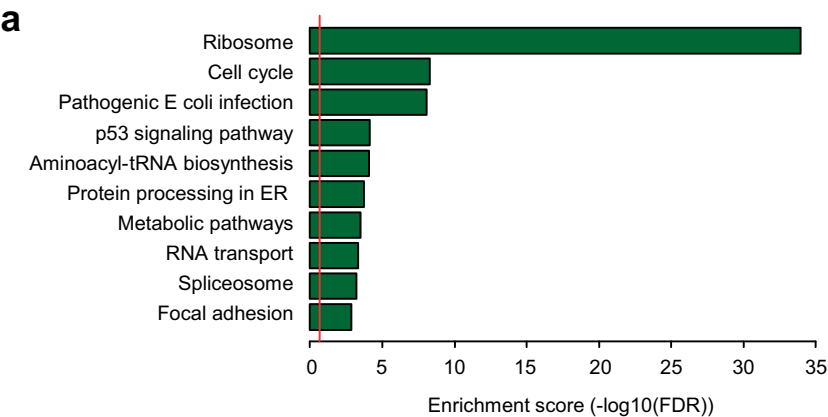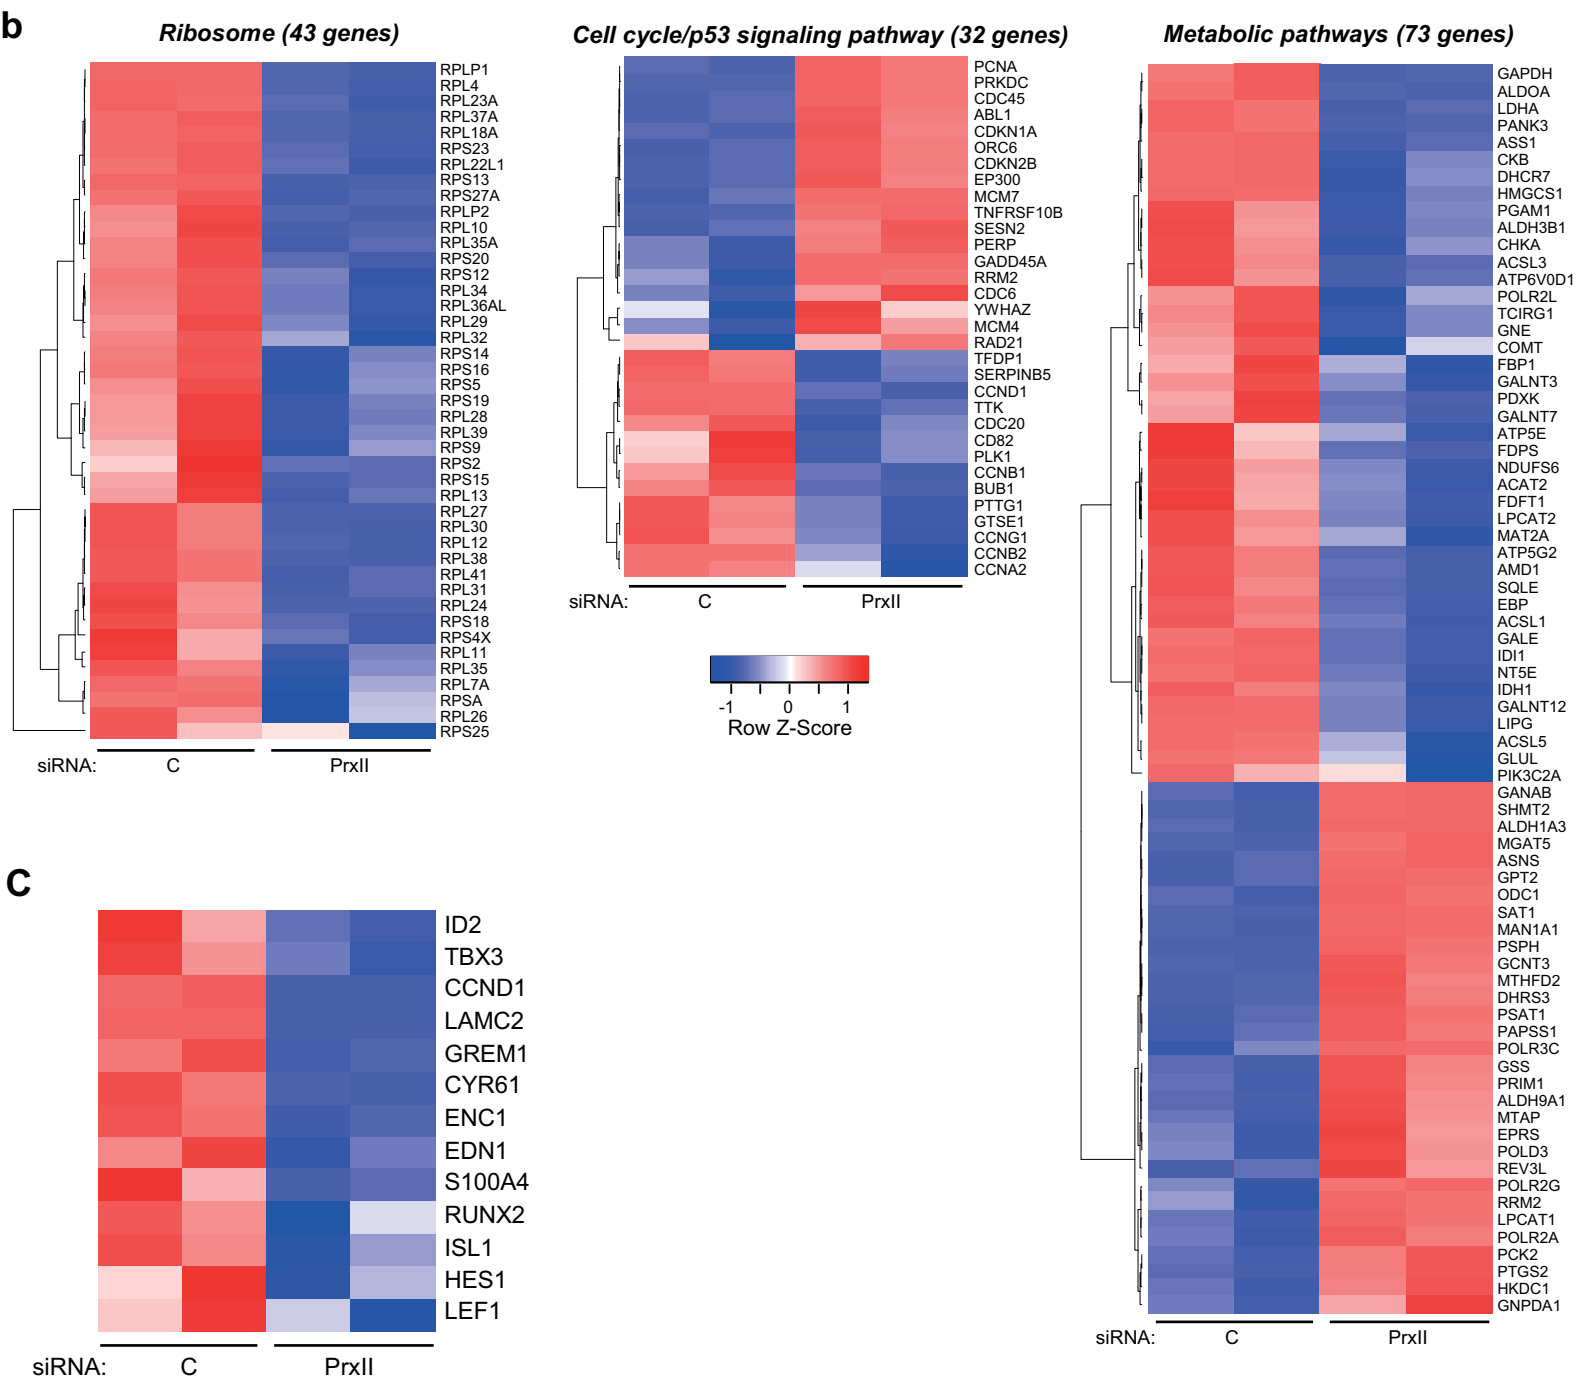

**Supplementary Fig. 5. Analysis of differentially expressed genes in HT29 cells after PrxII depletion.**

RNA-Seq was performed as described in *Methods*. The 789 differentially-expressed genes (DEG) were identified with false discovery rate (FDR) cut-off 0.05 and then analyzed for KEGG pathway.

**a.** Bar plot showing top 10 KEGG pathways with significant FDR values.

**b.** Heat map depicting the list of DEGs belonging to representative KEGG pathways. Duplicate experimental data sets are shown in parallel.

**c.** Heat map depicting the significant downregulation of  $\beta$ -catenin/TCF-dependent gene expression by PrxII depletion in SW480 cells. Duplicate experiments are shown in parallel.

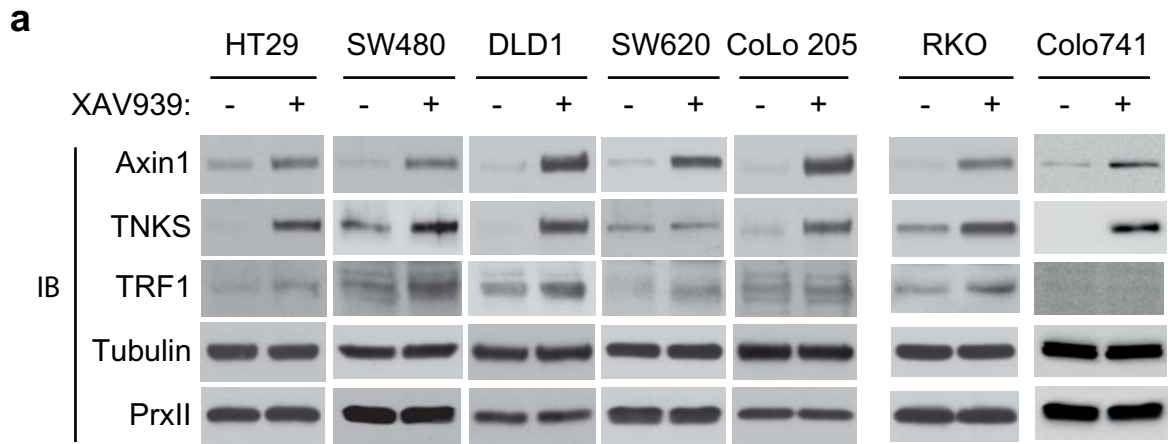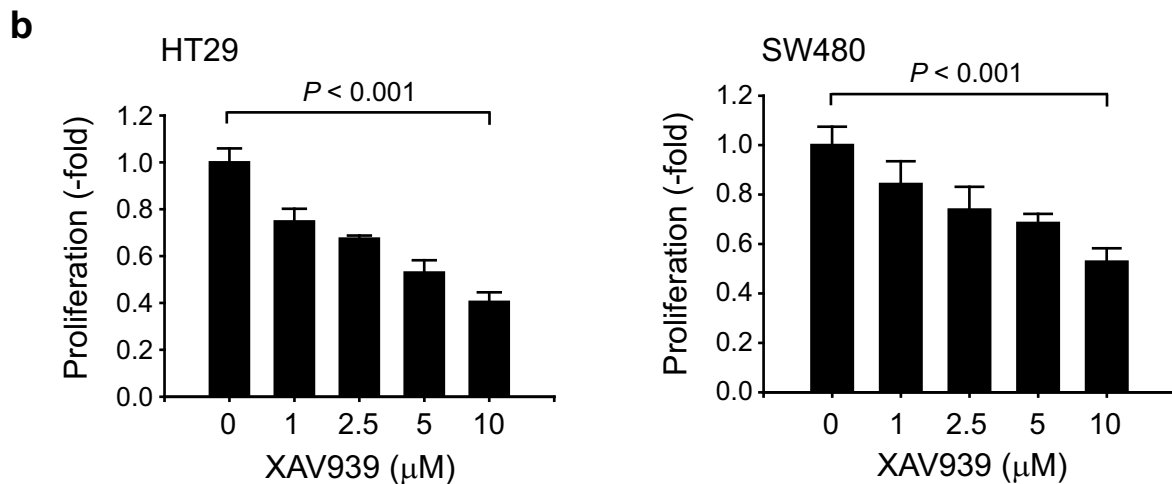

**Supplementary Fig 6. Levels of TNKS and its substrate proteins in APC-mutant CRC cells treated with a TNKS inhibitor XAV939.**

**a.** CRC cells were treated with DMSO vehicle control or TNKS inhibitor XAV939 (1μM) for 18 hr and then subjected to Western blot analysis for indicated proteins. HT29 and CoLo205 cells were exceptionally treated with 5 μM XAV939 for 18 hr. Immunoblot (IB) is a representative of two independent experiments with the same results.

**b.** HT29 and SW480 cells were treated with indicated concentrations of XAV939 for 36 hr. Cell number were measured with WST-1 reagent (Roche) according to manufacturer's protocol. Data in the graph show means ± SD of fold changes versus untreated sample ( $n = 3$ ). P values are indicated.

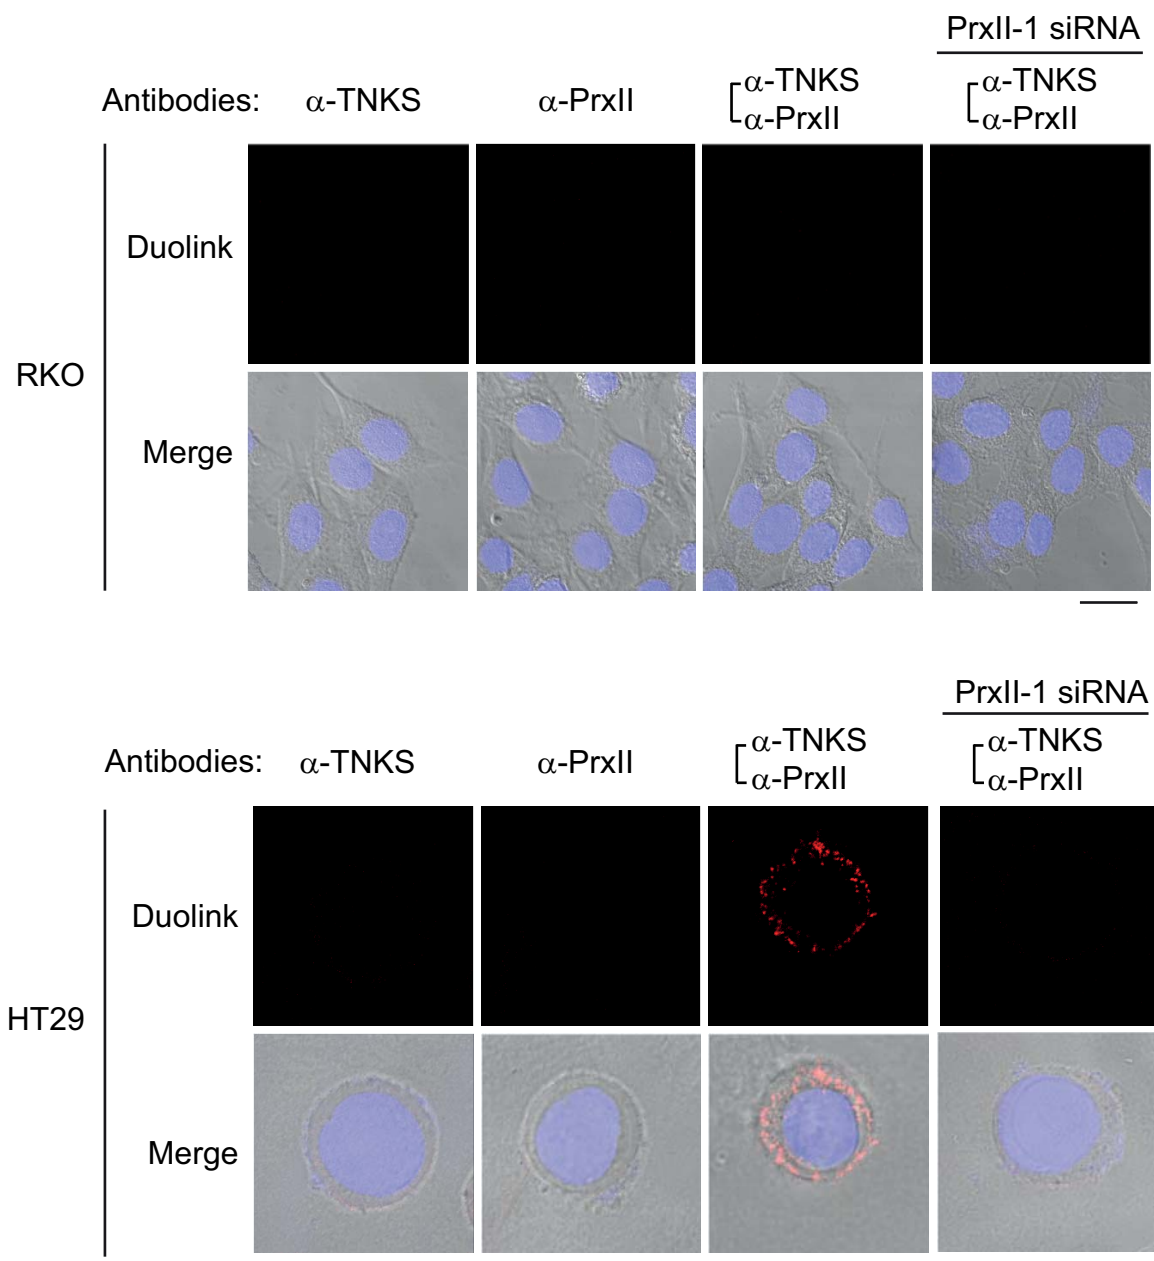

**Supplementary Fig. 7. Proximal ligation assay shows direct interaction between TNKS and PrxII in the cytosol of APC-mutant CRC cells.**

An *in situ* proximal ligation assay to detect binding between TNKS and PrxII proteins was performed in RKO and HT29 cells using DuoLink® *in situ* probes with the indicated antibodies. DuoLink Red fluorescence was detected only by the combination of anti-TNKS and anti-PrxII antibodies, not by single antibodies, which suggests a specific interaction between TNKS and PrxII. As a negative control, CRC cells were transfected with PrxII-1 siRNA. DIC and DAPI-stained images were merged with DuoLink fluorescence images (Merge). A representative image from three independent experiments is shown. Scale bar, 20  $\mu$ m (RKO) and 10  $\mu$ m (HT29).

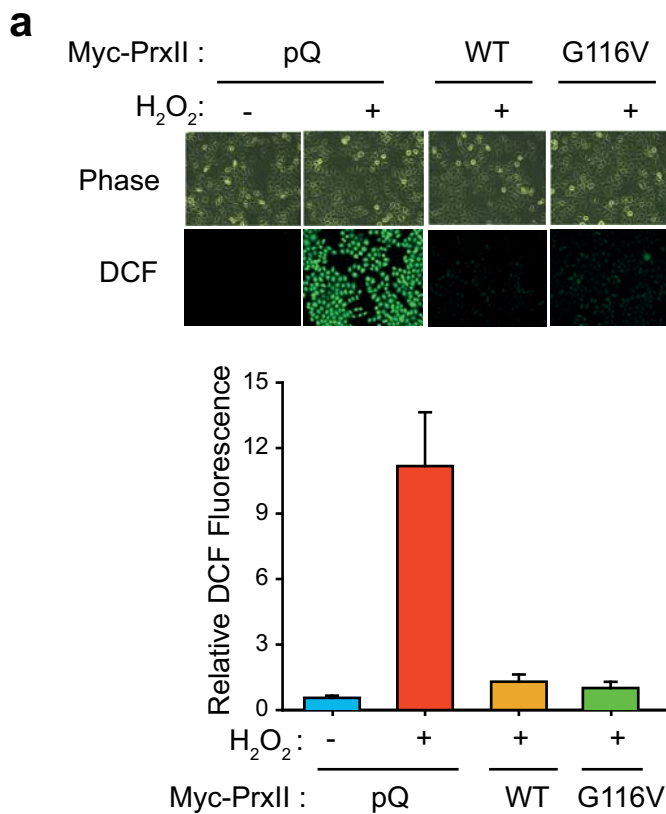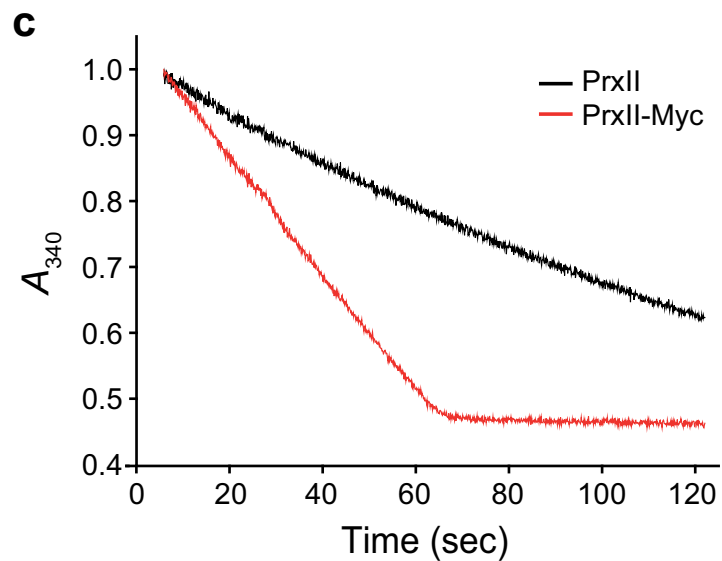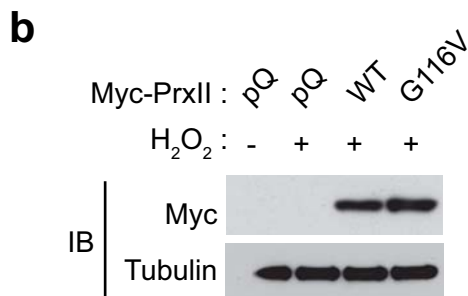

**Supplementary Fig. 8. Peroxidase activity of the PrxII G116V mutant and PrxII with a Myc tag.**

**a.** Cellular peroxidase activities were measured using an H<sub>2</sub>O<sub>2</sub>-sensitive fluorescence probe, 5,6-chloromethyl-2',7'-dichlorodihydrofluorescein diacetate. HEK293 cells were infected with retroviruses expressing WT and G116V mutant of Myc-tagged PrxII for 24 hr. The cells were treated with 100 μM H<sub>2</sub>O<sub>2</sub> for 10 min, washed with a phenol-red-free basal medium, and incubated with 5 μM 5,6-chloromethyl-2',7'-dichlorodihydrofluorescein diacetate at 37°C for 5 min. The dichlorofluorescein (DCF) fluorescence images were taken by a fluorescence microscope (Axiovert 200 Basic standard, Zeiss, Germany). The relative DCF fluorescence was calculated by averaging the fluorescence levels from 50 - 80 cells after subtracting the background fluorescence. Data in the graph are means ± SD of relative DCF fluorescence values from three independent experiments.

**b.** Immunoblotting (IB) was performed for checking the expression of indicated proteins. The empty retrovirus (pQ) was used for control.

**c.** Peroxidase activity assay using purified recombinant proteins of PrxII and PrxII with a Myc tag (PrxII-Myc) was performed in a reaction mixture containing 50mM HEPES (pH7.0), 4.3 μM human Trx, 0.165 μM rat liver TrxR, 200 μM NADPH, 100 μM H<sub>2</sub>O<sub>2</sub>, and 3.4 μM PrxII.

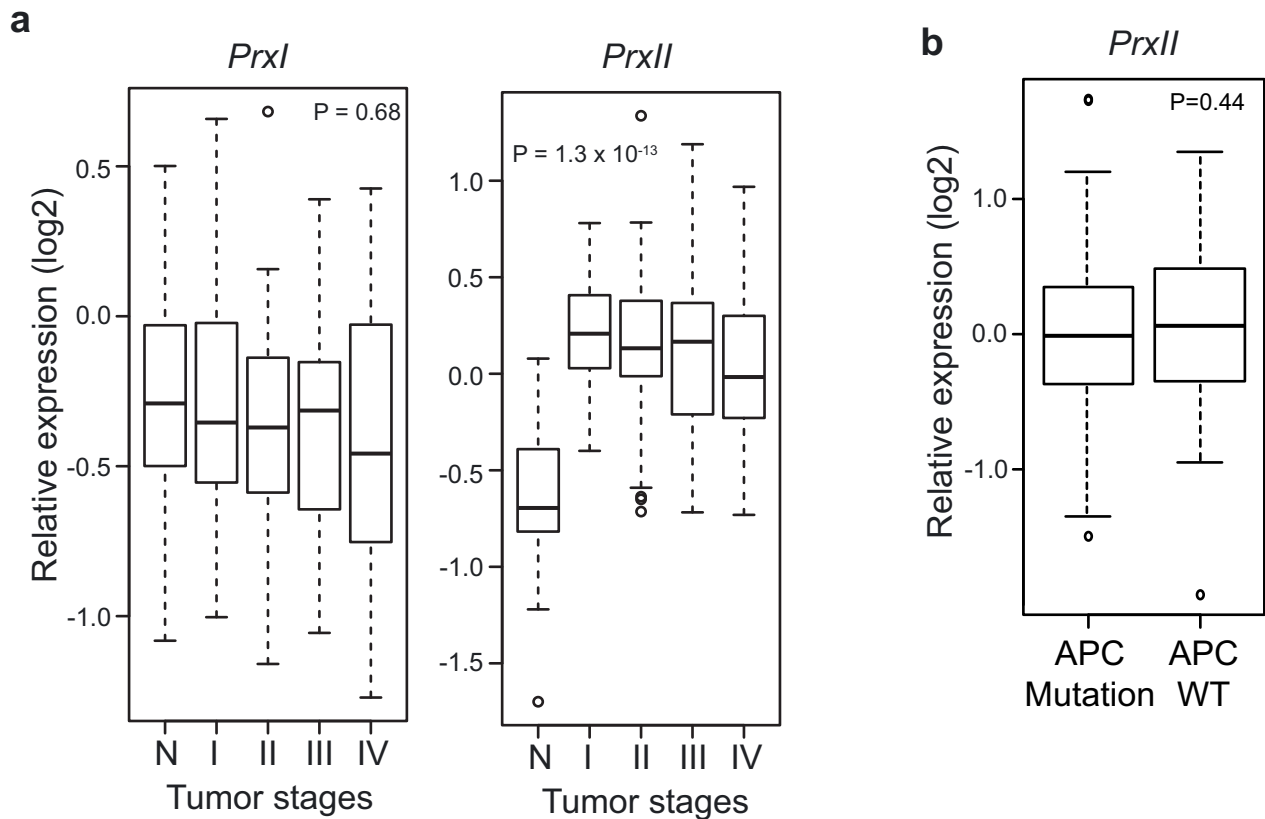

**Supplementary Fig. 9. Increased expression of *PrxII* genes in patients with colorectal cancer.**

**a.** Tumor stage-dependent expression of *PrxI* and *PrxII* genes, N, normal.

**b.** Expression levels of *PrxII* gene in colon cancer patients with APC WT ( $n = 45$ ) and APC mutation ( $n = 104$ ).

The GA platform data ( $n = 149$ ) from TCGA COAD database were used for analysis.

Box plot represents the average expression of *PrxI* and *PrxII*  $\pm$  SD. The horizontal line indicates the median value.

Supplementary Fig 10 Uncropped images of all the western blot data

Figure 1e

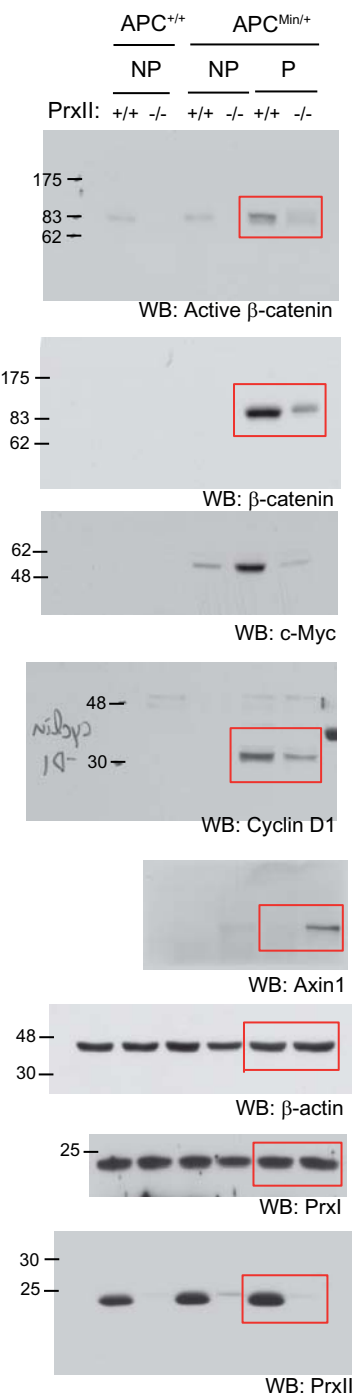

Figure 2a

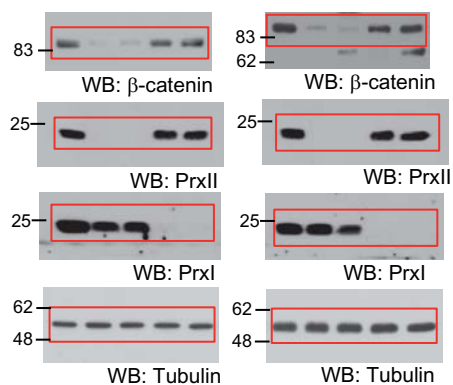

Figure 2b

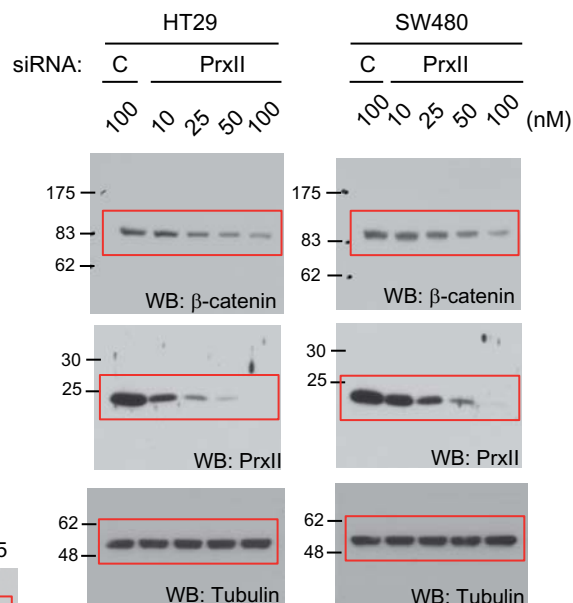

Figure 2c

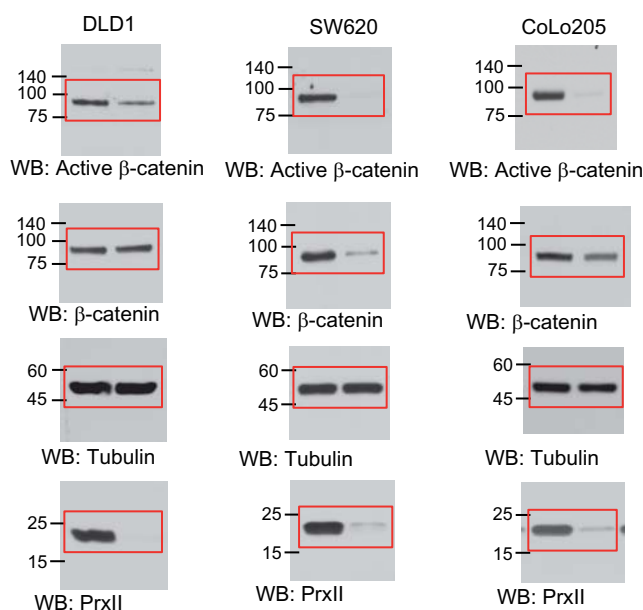

Figure 2d

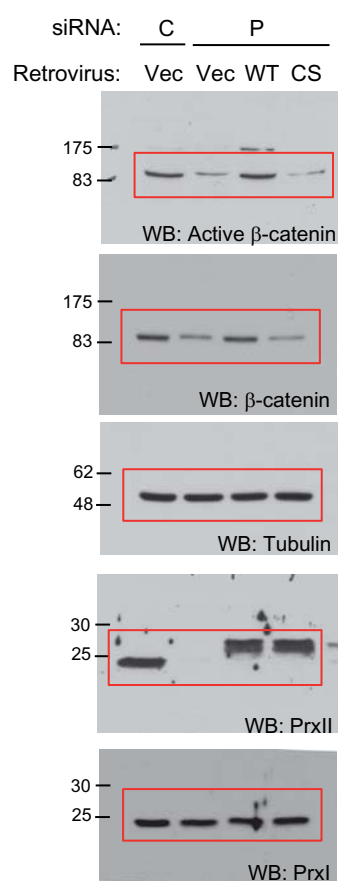

Figure 2e

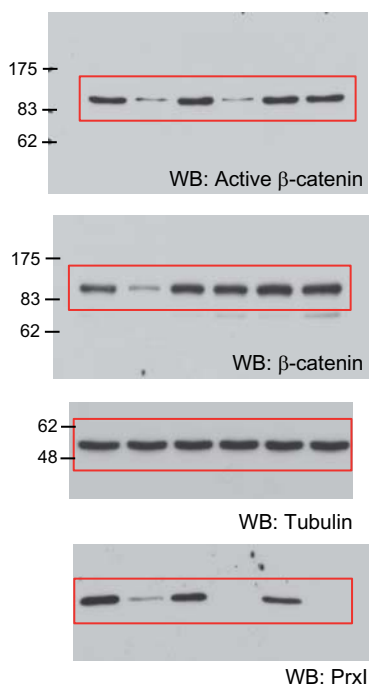







Figure 4e

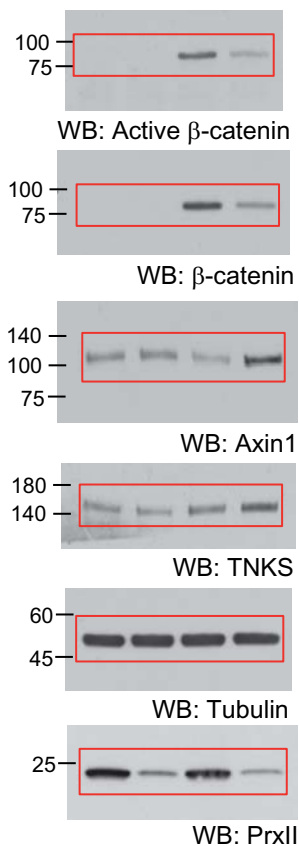

Figure 4f

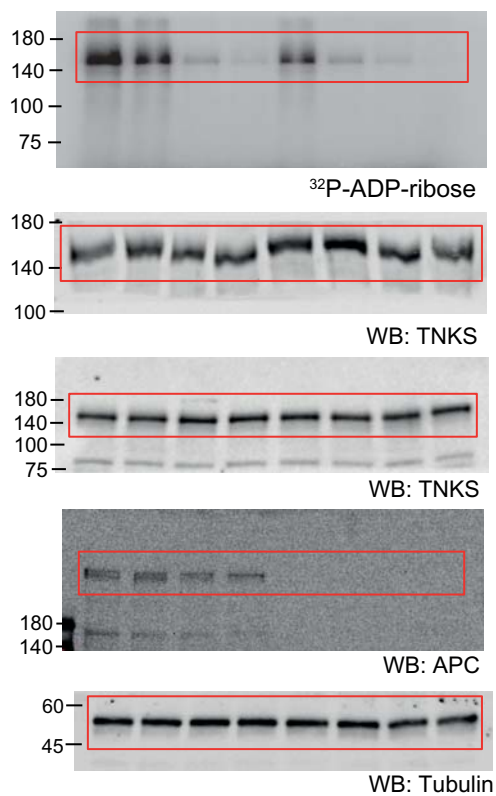

Figure 4g

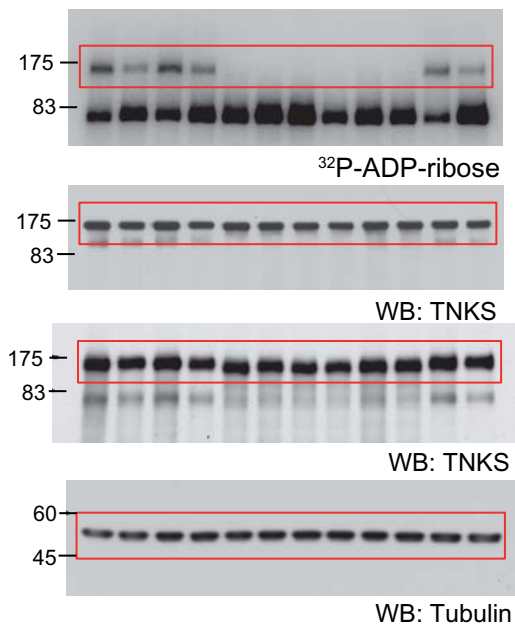

Figure 4h

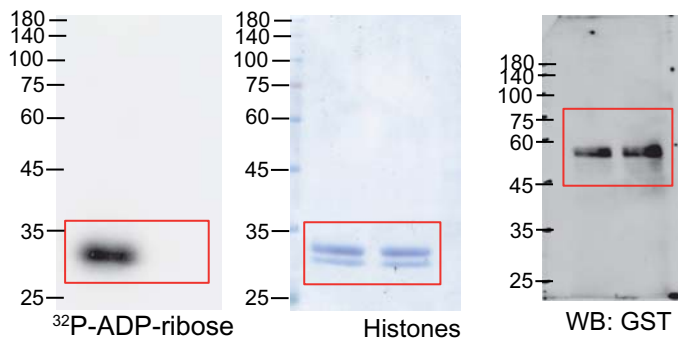

Figure 5a

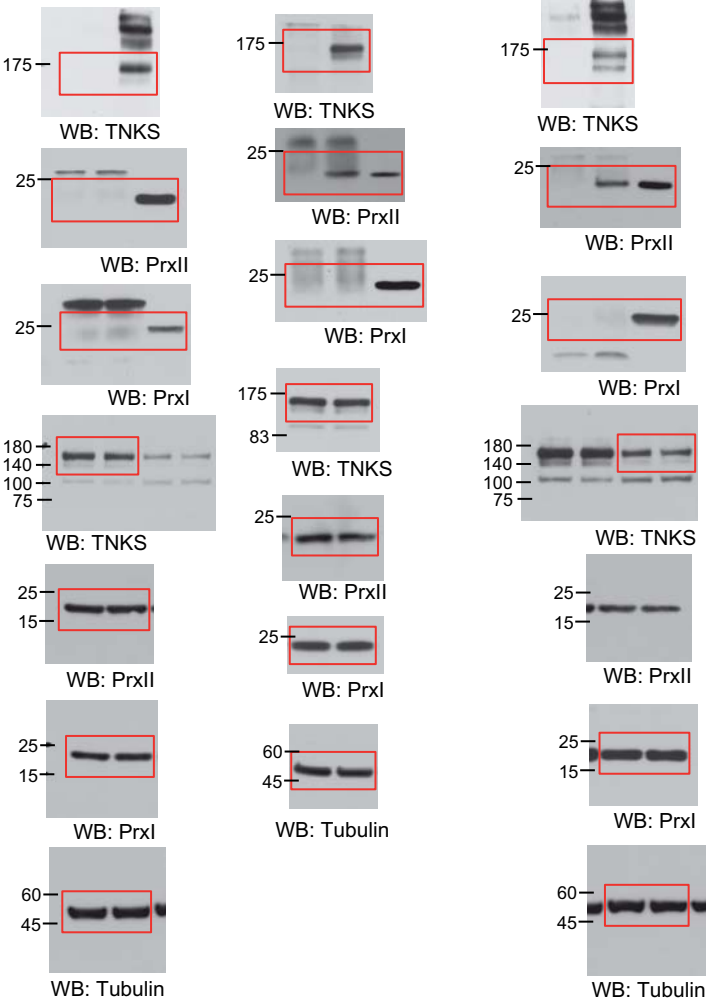

Figure 5b

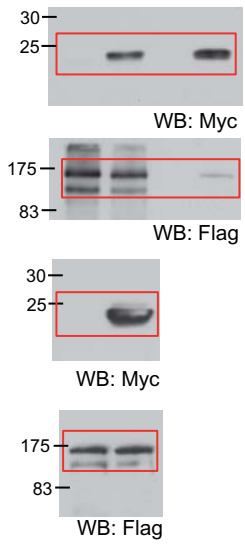

Figure 5d

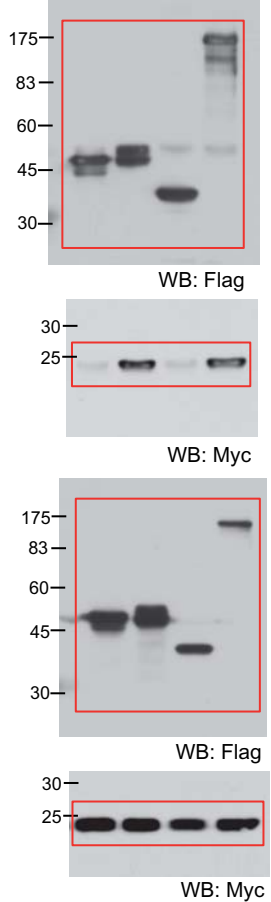

Figure 5e

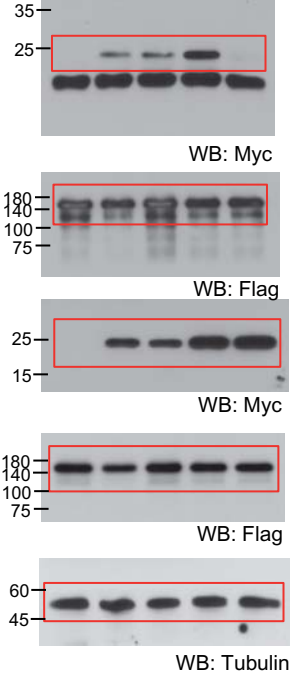

Figure 5f

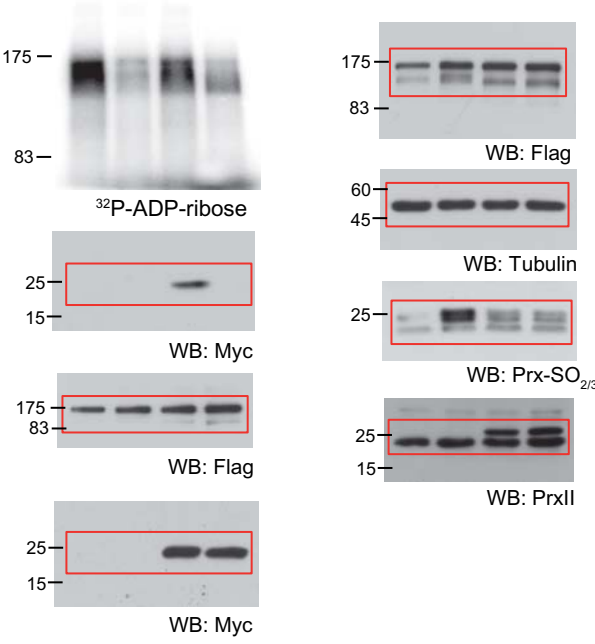

**Supplementary Figure 3a**

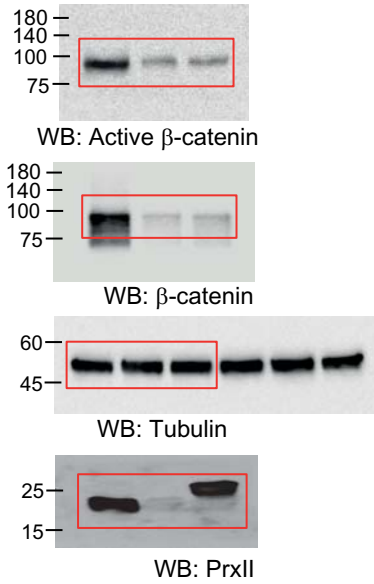

**Supplementary Figure 4a**

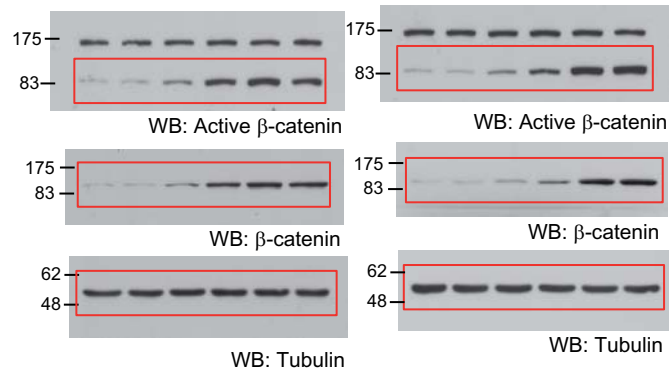

**Supplementary Figure 4b**

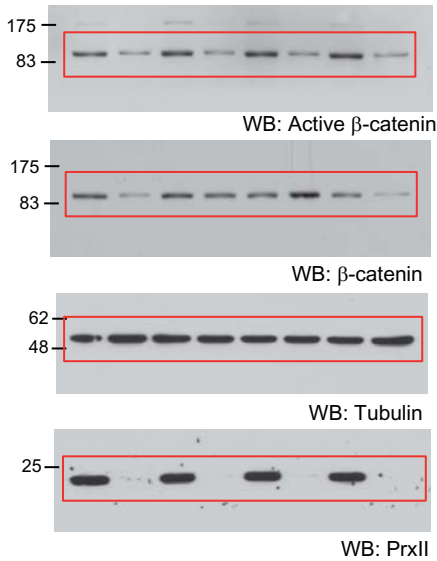

**Supplementary Figure 4c**

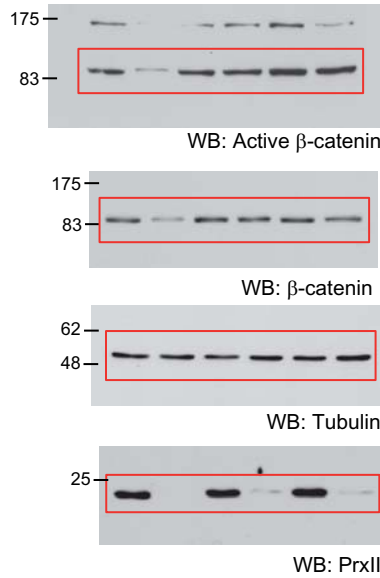

**Supplementary Figure 4e**

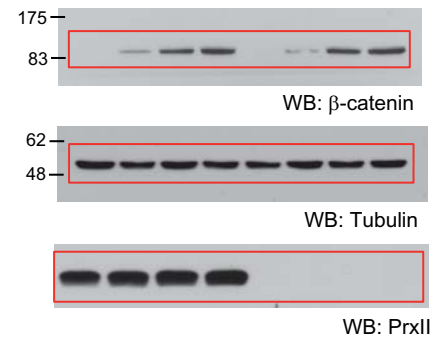

**Supplementary Figure 4d**

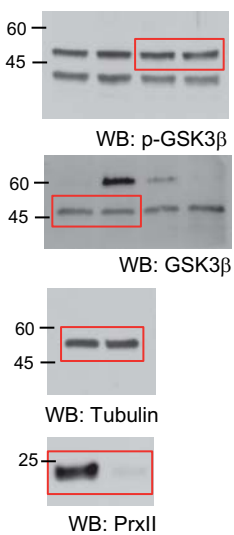

**Supplementary Figure 6**

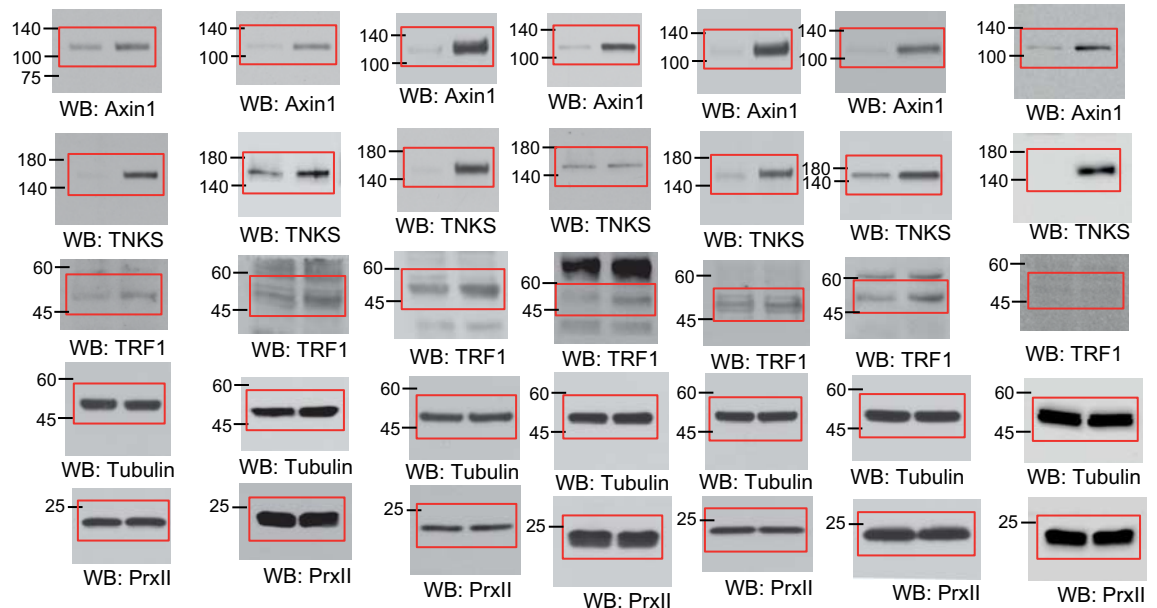

Supplement: 41467_2017_54_MOESM1_ESM.pdf [file 41467_2017_54_MOESM1_ESM.pdf]
